# Supplementary material for: Circular Design for Natural Fibers: A Literature Review on Life Cycle Evaluation Approaches for Environmental, Social and Economic Sustainability
Source: Preprints.org preprint supplement (doi:10.20944/preprints202409.1930.v1), 2024-09-24
Supplement: Supplementary file 1 [file supplementary]

## Sheet: Foglio1
Methodological approach	Cluster	Categories		Authors	Title	Year	Source (Journal)	Abbreviated Source Title	DOI	Affiliations	Abstract	Author Keywords	Funding Details	Publisher	ISSN	ISBN
LCA	Product	Wood	REFERENCES	Babarenda Gamage G.; Boyle C.; McLaren S.J.; McLaren J.	Life cycle assessment of commercial furniture: A case study of Formway LIFE chair	2008	International Journal of Life Cycle Assessment	Int. J. Life Cycle Assess.	10.1007/s11367-008-0002-3	Department of Civil and Environmental Engineering, International Centre for Sustainability Engineering and Research, University of Auckland, Auckland, 20 Symonds Street, New Zealand; Formway Furniture, Lower Hutt, Wellington, 176 Gracefield Road, New Zealand; Society and Sustainability, Landcare Research, Lincoln 7640, PO Box 40, New Zealand	Background, aims and scope: The environmental aspects of companies and their products are becoming more significant in delivering competitive advantage. Formway Furniture, a designer and manufacturer of office furniture products, is a New Zealand-based company that is committed to sustainable development. It manufactures two models of the light, intuitive, flexible and environmental (LIFE) office…	Carbon footprint; Case study; Commercial furniture; LCA; LIFE chair; Life cycle assessment; Office furniture	Foundation for Research, Science and Technology, FRST, (C09X0310, FMYX0502, FMYX0506)		9483349
LCA	End of life	Fibers		Bianco I.; Gerboni R.; Picerno G.; Blengini G.A.	Life Cycle Assessment (LCA) of MWool® Recycled Wool Fibers	2022	Resources	Resources	10.3390/resources11050041	Politecnico di Torino, DIATI, Corso Duca Degli Abruzzi 24, Turin, 10129, Italy; Politecnico di Torino, DENERG, Corso Duca Degli Abruzzi 24, Turin, 10129, Italy; Manteco SpA, Via della Viaccia, 19, Montemurlo, 59013, Italy	Textile industries are in the spotlight due to the heavy environmental impacts along their products’ life cycle and, at the same time, they are a priority sector in the new circular economy action plan of the European Commission. In this framework, the Italian company Manteco SpA has developed a value chain based on the recycling of pre-and post-consumer discarded textiles, wh0se output is a seco…	Circular Footprint Formula; environmental impacts; LCA; Life Cycle Assessment; recycled textile; recycled wool fiber; virgin wool fiber		MDPI	20799276
LCA	Method	Fashion and furniture		Castellani V.; Sala S.; Mirabella N.	Beyond the throwaway society: A life cycle-based assessment of the environmental benefit of reuse	2015	Integrated Environmental Assessment and Management	Integr. Environ. assess. manage.	10.1002/ieam.1614	Research Unit for Sustainable Development (GRISS), Department of Earth and Environmental Sciences, University of Milan Bicocca, Milan, Italy; Joint Research Center, European Commission, Ispra, Italy	In the context of a circular economy, sustainable consumption is often seen as the antithesis of current consumption patterns, which have led to the definition of the so-called throwaway society. Reuse may provide a preferred alternative to other waste management options, because it promotes resource efficiency and may significantly reduce environmental impacts. To appraise the environmental bene…	Avoided waste; Circular economy; Life Cycle Assessment; Reuse; Second-hand shops		Wiley-Blackwell	15513793
LCA	Manufacture	Fashion and furniture		Cimatti B.; Campana G.; Carluccio L.	Eco Design and Sustainable Manufacturing in Fashion: A Case Study in the Luxury Personal Accessories Industry	2017	Procedia Manufacturing	Procedia Manuf.	10.1016/j.promfg.2017.02.050	ISA (Institute of Advanced Studies), University of Bologna, V. Marsala 26, Bologna, 40126, Italy; DIN (Department of Industrial Engineering), University of Bologna, Viale Risorgimento 2, Bologna, 40136, Italy	The Fashion market is characterized by the rapidity with which a product becomes outmoded. Enterprises producing clothes, shoes, bags and other accessories generate wastes at a fast rhythm, due to the continuous change of collections. They must store notable quantities of textiles and components not longer used for production. Furthermore, the percentage of scraps of fabrics, leather and other ma…	Eco Design; LCA.; Recycling; Slow Fashion; Sustainability		Elsevier B.V.	23519789
LCA	Manufacture	Wood		Coloma-Jiménez M.; Akizu-Gardoki O.; Lizundia E.	Beyond ecodesign, internationalized markets enhance the global warming potential in the wood furniture sector	2022	Journal of Cleaner Production	J. Clean. Prod.	10.1016/j.jclepro.2022.134795	Life Cycle Thinking Group, Department of Graphic Design and Engineering Projects. University of the Basque Country (UPV/EHU), Plaza Ingeniero Torres Quevedo 1, Biscay, Bilbao, 48013, Spain; Ekopol, Transition Pathways Research Group, University of the Basque Country (UPV/EHU), Barrio Sarriena, s/n, Biscay, Leioa, 48940, Spain; BCMaterials, Basque Center for Materials, Pl. 3 Parque Científico UPV/…	Circular Economy principles encourage the implementation of bio-based and renewable materials over non-renewable technical counterparts. Wood-based materials can effectively address finite resource depletion and the accumulation of non-biodegradable waste into terrestrial and marine environments. In this context, the furniture industry has long relied on the use of wood for manufacture goods. How…	Eco-design; Environmental impact; Environmental product declaration; Life cycle assessment; Local manufacturing; Wooden furniture	Eusko Jaurlaritza, (IT-1365-19); Euskal Herriko Unibertsitatea, EHU, (GIC-18/22, GIU21/010)	Elsevier Ltd	9596526
LCA	Energy	Other		Cong R.-G.; Termansen M.	A bio-economic analysis of a sustainable agricultural transition using green biorefinery	2016	Science of the Total Environment	Sci. Total Environ.	10.1016/j.scitotenv.2016.07.137	Department of Environmental Science, Aarhus University, Roskilde, DK-4000, Denmark	Traditional pig production often relies on cereal-based feed, which has adverse environmental effects, e.g. nitrogen leaching and greenhouse gas (GHG) emissions. Alternative production systems are therefore sought to improve the sustainability of pig production. A promising alternative is to use proteinaceous feed from grass, produced in a green bio-refinery (GBR), to substitute part of the cerea…	Biotechnology; Cost-benefit analysis; Greenhouse gas emissions; Nitrogen leaching; Proteinaceous feed; Sustainable agriculture	Danish Centre for Environment and Energy; Delhi College of Engineering, DCE	Elsevier B.V.	489697
LCA	By-product	Other		Contreras A.M.; Rosa E.; Pérez M.; Van Langenhove H.; Dewulf J.	Comparative Life Cycle Assessment of four alternatives for using by-products of cane sugar production	2009	Journal of Cleaner Production	J. Clean. Prod.	10.1016/j.jclepro.2008.12.001	Faculty of Chemistry and Pharmacy, Central University of Las Villas, C.P. 54830 Santa Clara, Villa Clara, Carretera a Camajuani km 51/2, Cuba; Research Group ENVOC, Faculty of Bioscience Engineering, Ghent University, B-9000 Ghent, Coupure Links 653, Belgium	Cane sugar production by-products can be considered either as waste, affecting the environment, or as a resource when an appropriate valorization technology is implemented. This study is made with the objective of identifying and quantifying the aspects which have the largest environmental impact of four alternatives for using by-products and wastes from the cane sugar process and suggest improve…	Alcohol; Cane sugar; Environmental impact; Life Cycle Assessment (LCA); Sugar production by-products; Waste			9596526
LCA	Product	Other		D'Imporzano G.; Veronesi D.; Salati S.; Adani F.	Carbon and nutrient recovery in the cultivation of Chlorella vulgaris: A life cycle assessment approach to comparing environmental performance	2018	Journal of Cleaner Production	J. Clean. Prod.	10.1016/j.jclepro.2018.05.174	Gruppo Ricicla - DiSAA, Università degli Studi di Milano, Milano, Italy	Microalgae cultivation is arousing interest for its ability to provide biomass for food, feed and energy. Microalgae are more efficient in converting solar energy into biomass than terrestrial plants, and microalgae cultivated in a mixotrophic mode showed a higher biomass productivity. This work aimed to evaluate the environmental impacts of the cultivation of microalgae in autotrophy and mixotro…	By-products; Cheese whey; Chlorella vulgaris; LCA; Microalgae; Mixotrophy	Call Biotecnologie, (2014-0587); Fondazione Cariplo	Elsevier Ltd	9596526
LCA	System	Fashion and furniture		Dahlbo H.; Aalto K.; Eskelinen H.; Salmenperä H.	Increasing textile circulation—Consequences and requirements	2017	Sustainable Production and Consumption	Sustain. Prod. Consum.	10.1016/j.spc.2016.06.005	Finnish Environment Institute, P.O. Box 140, Helsinki, FI-00251, Finland; University of Helsinki, Consumer Society Research Centre, P.O. Box 24, University of Helsinki, 00014, Finland	The global textile fiber production, consumption of textiles and amounts of textile waste are constantly growing. The increase of textile waste has also been demonstrated in sorting studies performed for the municipal solid waste, where the share of textiles has grown. Ideally, recycling and, even more so, reusing textiles can reduce the production of new textiles from virgin materials and hence …	LCA; Policy measures; Recovery; Reuse; Textile; Textile waste	Finnish solid waste association JLY; HAMK; UFF Finland; Ministry of Environment, MOE, (YM192/481/2012)	Elsevier B.V.	23525509
LCA, LCC	Method	Food		De Menna F.; Davis J.; Östergren K.; Unger N.; Loubiere M.; Vittuari M.	A combined framework for the life cycle assessment and costing of food waste prevention and valorization: an application to school canteens	2020	Agricultural and Food Economics	Agric. Food Econ.	10.1186/s40100-019-0148-2	Department of Agricultural and Food Sciences, University of Bologna, Viale Giuseppe Fanin 50, Bologna, 40127, Italy; Research Institutes of Sweden, Agrifood and Bioscience, Forskningsbyn Ideon, Scheelevägen 27, Lund, SE-223 70, Sweden; University of Natural Resources and Life Sciences (BOKU), Muthgasse 107, Wien, A-1190, Vienna, Austria; Deloitte Sustainability, 185 Avenue Charle de Gaulle, 92 20…	About one third of global edible food is lost or wasted along the supply chain, causing the wastage of embedded natural and economic resources. Life cycle methodologies can be applied to identify sustainable and viable prevention and valorization routes needed to prevent such inefficiencies. However, no systemic approach has been developed so far to guide practitioners and stakeholders. Specifica…	E-LCC; Food loss; Food waste; LCA; Life cycle assessment; Life cycle costing; REFRESH	European Union Horizon 2020 Research and Innovation Programme; REFRESH; Horizon 2020 Framework Programme, H2020, (641933)	Springer	21937532
LCA, LCC	Method	Food		De Menna F.; Dietershagen J.; Loubiere M.; Vittuari M.	Life cycle costing of food waste: A review of methodological approaches	2018	Waste Management	Waste Manage.	10.1016/j.wasman.2017.12.032	Department of Agricultural and Food SciencesUniversity of Bologna, V.le G. Fanin 50, Bologna, 40127, Italy; Deloitte Sustainability, 185, Avenue Charles de Gaulle, Neuilly sur Seine, 92524, France	Food waste (FW) is a global problem that is receiving increasing attention due to its environmental and economic impacts. Appropriate FW prevention, valorization, and management routes could mitigate or avoid these effects. Life cycle thinking and approaches, such as life cycle costing (LCC), may represent suitable tools to assess the sustainability of these routes. This study analyzes different …	Food losses; Food waste; LCC modelling; Life cycle costing	Horizon 2020 Framework Programme, H2020, (641933)	Elsevier Ltd	0956053X
LCA	Energy	Food		de Menna F.; Vittuari M.; Molari G.	Impact evaluation of integrated food-bioenergy systems: A comparative LCA of peach nectar	2015	Biomass and Bioenergy	Biomass Bioenergy	10.1016/j.biombioe.2014.12.004	Department of Agricultural and Food Sciences, University of Bologna, Viale Giuseppe Fanin 50, Bologna, 40127, Italy	Processed food products present high energy intensity, along with a large amount of food losses and waste. The recovery of residual biomass as integrated renewable energy source could represent an interesting option for the substitution of fossil energy, contributing to the transition of agro-food sector towards a low-carbon economy. Two scenarios were compared, in order to evaluate the impacts o…	Bioenergy; Food systems; Food waste; Life cycle assessment (LCA); Peach nectar		Elsevier Ltd	9619534
LCA, LCC	Energy	Food		Derose K.; Liu F.; Davis R.W.; Simmons B.A.; Quinn J.C.	Conversion of Distiller's Grains to Renewable Fuels and High Value Protein: Integrated Techno-Economic and Life Cycle Assessment	2019	Environmental Science and Technology	Environ. Sci. Technol.	10.1021/acs.est.9b03273	Mechanical Engineering, Colorado State University, Fort Collins, 80523, CO, United States; Biomass Science and Conversion Technologies, Sandia National Laboratories, Livermore, 94550, CA, United States; Joint BioEnergy Institute, Deconstruction Division, Lawrence Berkeley National Laboratory, Emeryville, 94720, CA, United States	Distiller's grains are a byproduct of corn ethanol production and provide an opportunity for increasing the economic viability and sustainability of the overall grain-to-fuels process. Typically, these grains are dried and sold as a ruminant feed adjunct. This study considers utilization of the residuals in a novel supplementary fermentation process to produce two products, enriched protein and f…		Office of Biological and Environmental Research, (DE-AC02- 05CH11231); U.S. Department of Energy, USDOE; Office of Science, SC; National Nuclear Security Administration, NNSA, (DE-NA0003525); Lawrence Berkeley National Laboratory, Berkeley Lab; Bioenergy Technologies Office, BETO, (26336)	American Chemical Society	0013936X
LCA, LCC	Energy	Food		Diaz F.; Vignati J.A.; Marchi B.; Paoli R.; Zanoni S.; Romagnoli F.	Effects of Energy Efficiency Measures in the Beef Cold Chain: A Life Cycle-based Study	2021	Environmental and Climate Technologies	Environ. Clim. Technol.	10.2478/rtuect-2021-0025	Institute of Energy Systems and Environment, Riga Technical University, Azenes iela 12/1, Riga, LV-1048, Latvia; Univerista Degli Studi di Brescia, Via Branze 38, Brescia, 25123, Italy; Università Degli Studi dell'Insubria, Via Ravasi 2, Varese, 2110, Italy	Circular economy and industrial symbiosis represent a production and consumption model involving sharing, lending, reusing, and recycling existing materials and products in the most efficient way to increase sustainability and reduce or eliminate waste. Beef production has a high impact on the environment in different impact categories, especially those activities related to livestock breeding an…	beef; circular economy; cold chain; industrial symbiosis; LCA; LCC; sustainability	Horizon 2020 Framework Programme, H2020, (847040)	Sciendo	22558837
LCA, LCC	Method	Fibers		Ead A.S.; Appel R.; Alex N.; Ayranci C.; Carey J.P.	Life cycle analysis for green composites: A review of literature including considerations for local and global agricultural use	2021	Journal of Engineered Fibers and Fabrics	J. Eng. Fibers Fabr.	10.1177/15589250211026940	Department of Mechanical Engineering, University of Alberta, Edmonton, AB, Canada	Increasing concerns regarding human-driven effects on the biosphere have led to the development and adoption of environmentally friendly “green” composites. Unlike conventional synthetic composites, green composites are made of natural materials in either the matrix or the fiber reinforcement (or both). They are claimed to have lower negative environmental effects due to their sustainability and …	Braiding; composite fabrics; green composites; life cycle analysis; textile composites	Natural Sciences and Engineering Research Council of Canada, NSERC	SAGE Publications Ltd	15589250
SLCC, ELCC	Method	Food		Edwards J.; Burn S.; Crossin E.; Othman M.	Life cycle costing of municipal food waste management systems: The effect of environmental externalities and transfer costs using local government case studies	2018	Resources, Conservation and Recycling	Resour. Conserv. Recycl.	10.1016/j.resconrec.2018.06.018	Department of Chemical and Environmental Engineering, RMIT University, Melbourne, 3000, Australia; Faculty of Science, Engineering and Technology, Swinburne University of Technology, Hawthorn, 3121, Australia; Manufacturing Flagship, Commonwealth Scientific and Industrial Research Organisation (CSIRO), Clayton, 3168, Australia	Municipal food waste is of growing interest worldwide as governments strive to reduce wastes’ environmental impact. For local governments responsible for waste collection, treatment and disposal; finding an affordable management and treatment solution with the smallest impact on the environment is paramount. This paper introduces a life cycle costing tool, incorporating both an Environmental LCC …	Food waste; LCC; Life cycle assessment; Life cycle costing; Municipal waste	Commonwealth Scientific and Industrial Research Organisation, CSIRO; RMIT University, RMIT	Elsevier B.V.	9213449
LCA	Energy	Waste		Ekman A.; Campos M.; Lindahl S.; Co M.; Börjesson P.; Karlsson E.N.; Turner C.	Bioresource utilisation by sustainable technologies in new value-added biorefinery concepts - Two case studies from food and forest industry	2013	Journal of Cleaner Production	J. Clean. Prod.	10.1016/j.jclepro.2013.06.003	Lund University, Department of Technology and Society, Environmental and Energy Systems Studies, SE-221 00 Lund, P.O. Box 118, Sweden; Lund University, Department of Chemistry, Centre for Analysis and Synthesis, SE-221 00 Lund, P.O. Box 124, Sweden; Uppsala University, Department of Physical and Analytical Chemistry, SE-751 24 Uppsala, P.O. Box 599, Sweden; Lund University, Department of Chemistr…	This paper presents a trans-disciplinary assessment of new and innovative biorefinery concepts producing high-value chemical compounds from residues from agriculture, food and forest industries. There is a significant potential of biomass residues in Sweden suitable for the extraction of various compounds, including upgrading by biocatalytic processes, in addition to current energy generation. Tw…	Biocatalysis; By-products; Extraction; High-value compounds; Life cycle assessment	FP7 framework program AMYLOMICS; Oscar & Lili Lamm's Foundation; Swedish Research Council VR, (2010-333, 2010-5439); Seventh Framework Programme, FP7, (265992); Swedish Foundation for International Cooperation in Research and Higher Education, STINT, (YR2009-7015); Svenska Forskningsrådet Formas, (229-2009-1527)		9596526
LCA	Product	Wood		Eshun J.F.; Potting J.; Leemans R.	Inventory analysis of the timber industry in Ghana	2010	International Journal of Life Cycle Assessment	Int. J. Life Cycle Assess.	10.1007/s11367-010-0207-0	Environmental Systems Analysis Group, Wageningen University, PO Box 47, 6708PB Wageningen, Netherlands	Background, aim, and scope The timber sector, i.e., forestry and timber industry, plays an important role in the socioeconomic development of Ghana through timber products export. Timber production in this sector is associated with increasing environmental burdens in terms of use of materials and energy, production of emissions and waste, and land use changes. The purpose of this study was to com…	Functional units; Ghanaian timber; Inventory analysis; Life cycle inventory (LCI); Tropical wood			9483349
SLCA	Method	Waste		Falcone P.M.; González García S.; Imbert E.; Lijó L.; Moreira M.T.; Tani A.; Tartiu V.E.; Morone P.	Transitioning towards the bio-economy: Assessing the social dimension through a stakeholder lens	2019	Corporate Social Responsibility and Environmental Management	26	https://www.scopus.com/inward/record.uri?eid=2-s2.0-85067652132&doi=10.1002%2fcsr.1791&partnerID=40&md5=57c61c9a564fa8a022f9e5ecc9f12d99	Falcone P.M., Bioeconomy in Transition Research Group, Unitelma Sapienza—University of Rome, Rome, Italy; González García S., Department of Chemical Engineering, Institute of Technology, Universidade de Santiago de Compostela, Santiago, Spain; Imbert E., Bioeconomy in Transition Research Group, Unitelma Sapienza—University of Rome, Rome, Italy; Lijó L., Department of Chemical Engineering, Institu…	bio-based products; SLCA; social impacts; social innovation; stakeholder analysis		The authors are very grateful to the STAR-ProBio project (Sustainability Transition Assessment and Research of Bio-based Products) for their financial support. The project is funded by the European Union's Horizon 2020 Research and Innovation Programme under Grant Agreement 727740, Work Programme BB-01-2016: Sustainability schemes for the bio-based economy.
LCA	Product	Fibers		Fatima Haq F.; Mahmood H.; Iqbal T.; Measam Ali M.; Jafar Khan M.; Moniruzzaman M.	Development of sustainable biocomposite panels assisted with deep eutectic solvent pretreatment of agro-industrial residue	2022	Journal of Molecular Liquids	J Mol Liq	10.1016/j.molliq.2022.120417	Department of Chemical Polymer & Composite Materials Engineering, University of Engineering & Technology, New Campus, Lahore, Pakistan; Department of Chemical Engineering, Government College University, Faisalabad, Gurunanakpura, 38000, Pakistan; Department of Chemical Engineering, Universiti Teknologi PETRONAS, Perak Darul Ridzuan, Seri Iskandar, 32610, Malaysia	The pretreatment of lignocellulosic biomass in biorefineries is a very promising path for their conversion into value-added products. However, development of sustainable pretreatment for efficient conversion of lignocellulosic biomass into value-added materials is still an emergent and challenging field. Herein, a new direction for the utilization of deep eutectic solvent (DES) pretreatment of li…	Deep eutectic solvents; Lignocellulosic fibers; Mechanical properties; Renewable resource; Sustainable biocomposite	Ministry of Higher Education, Malaysia, MOHE; Higher Education Commission, Pakistan, HEC, (FRGS/1/2019/ TK10/ UTP /02/3)	Elsevier B.V.	1677322
LCA	End of life	Fashion and furniture		Fidan F.Ş.; Aydoğan E.K.; Uzal N.	An integrated life cycle assessment approach for denim fabric production using recycled cotton fibers and combined heat and power plant	2021	Journal of Cleaner Production	J. Clean. Prod.	10.1016/j.jclepro.2020.125439	Department of Industrial Engineering, Erciyes University, Kayseri, 38060, Turkey; Department of Civil Engineering, Abdullah Gul University, Kayseri, 38060, Turkey	Due to the increase in consumption and awareness of environmental impacts, switching to new business models has become mandatory in the textile industry. The aim of this study is to investigate the contribution of using mechanically recycled cotton fiber instead of virgin cotton fiber, which is one of the most important raw materials in textiles and grown using a high amount of water and pesticid…	CHP Plant; Denim; LCA; Recycled cotton; Sustainability; TODIM		Elsevier Ltd	9596526
LCA	System	Fibers		Gonzalez V.; Lou X.; Chi T.	Evaluating Environmental Impact of Natural and Synthetic Fibers: A Life Cycle Assessment Approach	2023	Sustainability (Switzerland)	Sustainability	10.3390/su15097670	Department of Apparel, Merchandising, Design and Textiles, Washington State University, Pullman, 99164, WA, United States	This research aims to analyze the environmental impact of six fibers in the textile industry: conventional and organic cotton, silk, jute, flax, and polyester. The study used a life cycle assessment (LCA) methodology with a cradle-to-gate system boundary and analyzed the stages of agriculture, spinning, weaving, and dyeing. In agriculture production, five impact categories (i.e., fossil resource …	environmental impact; life cycle assessments; natural fibers; sustainable fashion; synthetic fibers; textiles		MDPI	20711050
LCA	Product	Wood		González-García S.; Feijoo G.; Widsten P.; Kandelbauer A.; Zikulnig-Rusch E.; Moreira M.T.	Environmental performance assessment of hardboard manufacture	2009	International Journal of Life Cycle Assessment	Int. J. Life Cycle Assess.	10.1007/s11367-009-0099-z	Department of Chemical Engineering, School of Engineering, University of Santiago de Compostela, Santiago de Compostela 15782, Spain; Kompetenzzentrum Holz, WOOD Carinthian Competence Centre, St. Veit an der Glan 9300, Austria	The forest-based and related industries comprise one of the most important industry sectors in the European Union, representing some 10% of the EU's manufacturing industries. Their activities are based on renewable raw material resources and efficient recycling. The forest-based industries can be broken down into the following sectors: forestry, woodworking, pulp and paper manufacturing, paper an…	Fibreboard; Hardboard; Life cycle assessment (LCA); Life cycle inventory (LCI) .Wet-process fibreboard; Wood boards .Wood panels	Ministerio de Educación, Cultura y Deporte, MECD, (AP2005-2374)		9483349
LCA	Product	Wood		González-García S.; García Lozano R.; Moreira M.T.; Gabarrell X.; Rieradevall i Pons J.; Feijoo G.; Murphy R.J.	Eco-innovation of a wooden childhood furniture set: An example of environmental solutions in the wood sector	2012	Science of the Total Environment	Sci. Total Environ.	10.1016/j.scitotenv.2012.03.077	Department of Chemical Engineering, School of Engineering, University of Santiago de Compostela, 15782-Santiago de Compostela, Spain; Division of Biology, Department of Life Sciences, Sir Alexander Fleming Building, Imperial College of London, London SW7 2AZ, South Kensington Campus, United Kingdom; SosteniPrA (UAB-IRTA-Inèdit), Institute of Environmental Science and Technology (ICTA), Universita…	The environmental profile of a set of wood furniture was carried out to define the best design criteria for its eco-design. A baby cot convertible into a bed, a study desk and a bedside table were the objects of study. Two quantitative and qualitative environmental approaches were combined in order to propose improvement alternatives: Life Cycle Assessment (LCA) and Design for Environment (DfE). …	Eco-design; Environmental impacts; Furniture; Life cycle assessment; Wood products	Centre de Difusió Tecnològica de la Fusta i Moble de Catalunya; Ministerio de Educación, Cultura y Deporte, MECD, (EX2009-0740); Xunta de Galicia, (GRC 2010/37)		18791026
LCA	Product	Wood		González-García S.; Gasol C.M.; Lozano R.G.; Moreira M.T.; Gabarrell X.; Rieradevall i Pons J.; Feijoo G.	Assessing the global warming potential of wooden products from the furniture sector to improve their ecodesign	2011	Science of the Total Environment	Sci. Total Environ.	10.1016/j.scitotenv.2011.09.059	Division of Biology, Department of Life Sciences, Imperial College of London, London SW7 2AZ, Sir Alexander Fleming Building, South Kensington Campus, United Kingdom; Department of Chemical Engineering, School of Engineering, University of Santiago de Compostela, 15782- Santiago de Compostela, Spain; IRTA, 08348 Cabrils, Barcelona, Carretera de Cabrils km 2, Spain; SosteniPrA (UAB-IRTA), Institut…	The main objective of this study was to determine the global warming potential of several wood products as an environmental criterion for their ecodesign. Two methodologies were combined: the quantification of greenhouse gas emissions (equivalent CO 2) of several representative wood based products from the furniture sector and the integration of environmental aspects into product design. The prod…	Carbon Footprint; Design for the Environment (DfE); Improvement strategies; Life Cycle Assessment (LCA); Wood based products	Centre de Difusió Tecnològica de la Fusta i Moble de Catalunya; Ministerio de Educación, Cultura y Deporte, MECD, (EX2009-0740); Xunta de Galicia, (GRC 2010/37, PGIDIT08MDS005CT)		18791026
LCC	By-product	Fashion and furniture		Gounni A.; Mabrouk M.T.; El Wazna M.; Kheiri A.; El Alami M.; El Bouari A.; Cherkaoui O.	Thermal and economic evaluation of new insulation materials for building envelope based on textile waste	2019	Applied Thermal Engineering	Appl Therm Eng	10.1016/j.applthermaleng.2018.12.057	Laboratory of Physical Materials, Microelectronics, Automatics and Heat Transfer (LPMMAT), Faculty of Sciences, Hassan II University of Casablanca, Morocco; Université de Lorraine, CNRS, LEMTA, Nancy, F-54500, France; Laboratory of Physic-Chemical of Applied Materials, Sciences Faculty of Ben M'sik, Hassan II University Casablanca, Morocco; Laboratory REMTEX, Higher School of Textile and Clothing…	New thermal insulation materials made from textile waste based on acrylic and wool were developed using needle punching method. The aim of this work is to investigate the thermal performance of an external building wall outfitted with the developed insulation materials and submitted to the real climatic conditions of Casablanca, Morocco. A numerical finite volume model is developed and validated …	Life Cycle Cost analysis; Model; Optimal thickness; Textile waste; Thermal insulation; Thermoeconomic		Elsevier Ltd	13594311
LCSA	Method	Waste		Iacovidou E.; Busch J.; Hahladakis J.N.; Baxter H.; Ng K.S.; Herbert B.M.J.	A parameter selection framework for sustainability assessment	2017	Sustainability (Switzerland)	9	https://www.scopus.com/inward/record.uri?eid=2-s2.0-85028416143&doi=10.3390%2fsu9091497&partnerID=40&md5=35798203718a5c77b9804efa3dfca1c2	Iacovidou E., School of Civil Engineering, University of Leeds, Leeds, LS2 9JT, United Kingdom; Busch J., School of Earth and Environment, University of Leeds, Leeds, LS2 9JT, United Kingdom; Hahladakis J.N., School of Civil Engineering, University of Leeds, Leeds, LS2 9JT, United Kingdom; Baxter H., School of Environmental Sciences, University of Hull, Hull, HU6 7RX, United Kingdom, National Cen…	Anaerobic digestion; Food waste; LCSA; PESTEL; Resource recovery; Sustainability assessment	United Kingdom; anaerobic digestion; assessment method; conceptual framework; decision making; food waste; holistic approach; life cycle analysis; recycling; sustainability	Acknowledgments: We gratefully acknowledge support of the UK Natural Environment Research Council and Economic and Social Research Council under the Resource Recovery from Waste Programme which funds the CVORR project (Grant No. NE/L014149/1), the R3W project (Grant No. NE/L014211/1), the MeteoRR project (Grant No. NE/L014246/1) and the AVAnD project (Grant No. NE/L014122/1).
LCA	By-product	Other		Iribarren D.; Moreira M.T.; Feijoo G.	Implementing by-product management into the life cycle assessment of the mussel sector	2010	Resources, Conservation and Recycling	Resour. Conserv. Recycl.	10.1016/j.resconrec.2010.03.017	Department of Chemical Engineering, University of Santiago de Compostela, Santiago de Compostela, Spain	In Galicia (NW Spain), the mussel sector is an economic and social cornerstone, with great relevance at both regional and international scales. The environmental impact of this sector has been recently discussed from a Life Cycle Assessment (LCA) perspective. In previous studies, it was concluded that the management of mussel shells and mussel organic by-products needed to be implemented into fut…	Calcium carbonate; Life Cycle Assessment; Mussel; Pâté; Shell; Valorization	Ministerio de Educación, Cultura y Deporte, MECD, (AP2006-03904)	Elsevier B.V.	9213449
LCA	Product	Wood		Iritani D.R.; Silva D.A.L.; Saavedra Y.M.B.; Grael P.F.F.; Ometto A.R.	Sustainable strategies analysis through Life Cycle Assessment: A case study in a furniture industry	2015	Journal of Cleaner Production	J. Clean. Prod.	10.1016/j.jclepro.2014.05.029	Department of Production Engineering, São Carlos School of Engineering, University of São Paulo, 400 Trabalhador São-Carlense Avenue, São Carlos, 13566-590, Brazil; Environmental Engineering Sciences, São Carlos School of Engineering, University of São Paulo, 400 Trabalhador São-Carlense Avenue, São Carlos, 13566-590, Brazil	Abstract This article aims to analyze sustainable strategies by assessing the environmental performance of a wardrobe built from medium density particleboard. For this, the Life cycle assessment technique was used. The product life cycle studied was a cradle-to-gate type, including three main stages: raw materials supply, wardrobe manufacturing and distribution of the wardrobe. The functional uni…	Environmental impact; Environmental performance; Life Cycle Assessment (LCA); Medium density particleboard(MDP); Sustainability; Sustainable strategy	Fundação de Amparo à Pesquisa do Estado de São Paulo, FAPESP, (2011/03816-6, 2013/06736-9); Conselho Nacional de Desenvolvimento Científico e Tecnológico, CNPq, (135162/2010-6, 152754/2010-5)	Elsevier Ltd	9596526
LCA, CBA	Method	Food		Kim M.-H.; Song Y.-E.; Song H.-B.; Kim J.-W.; Hwang S.-J.	Evaluation of food waste disposal options by LCC analysis from the perspective of global warming: Jungnang case, South Korea	2011	Waste Management	Waste Manage.	10.1016/j.wasman.2011.04.019	Department of Environmental Planning, Graduate School of Environmental Studies, Seoul National University, Sillim-Dong, Gwanak-Gu, Seoul 151-742, San 56-1, South Korea; Department of Philosophy, Dongguk University, Jung-Gu, Seoul 100-715, Pil-Dong 3-Ga, South Korea; Department of Life Science, Dongguk University, Jung-Gu, Seoul 100-715, Pil-Dong 3-Ga, South Korea; Department of Chemical Engineeri…	The costs associated with eight food waste disposal options, dry feeding, wet feeding, composting, anaerobic digestion, co-digestion with sewage sludge, food waste disposer, incineration, and landfilling, were evaluated in the perspective of global warming and energy and/or resource recovery. An expanded system boundary was employed to compare by-products. Life cycle cost was analyzed through the…	Energy recovery; Environmental impact; Food waste; Global warming; Life cycle cost	Ministry of Education - Singapore, MOE; Ministry of Environment, MOE		18792456
LCA	Energy	Other		Kimming M.; Sundberg C.; Nordberg Å.; Baky A.; Bernesson S.; Norén O.; Hansson P.-A.	Biomass from agriculture in small-scale combined heat and power plants - A comparative life cycle assessment	2011	Biomass and Bioenergy	Biomass Bioenergy	10.1016/j.biombioe.2010.12.027	Swedish University of Agricultural Sciences, Department of Energy and Technology, SE 750 07 Uppsala, P.O. Box 7032, Sweden; Swedish Institute of Agricultural and Environmental Engineering, SE 750 07 Uppsala, P.O. Box 7033, Sweden	Biomass produced on farm land is a renewable fuel that can prove suitable for small-scale combined heat and power (CHP) plants in rural areas. However, it can still be questioned if biomass-based energy generation is a good environmental choice with regards to the impact on greenhouse gas emissions, and if there are negative consequences of using of agricultural land for other purposes than food …	Biogas; CHP; Gasification; Green manure; LCA; Willows	Svenska Forskningsrådet Formas		9619534
LCA	Manufacture	Other		Kjaerheim G.	Cleaner production and sustainability	2005	Journal of Cleaner Production	J. Clean. Prod.	10.1016/S0959-6526(03)00119-7	Cecilia Askham Nyland, Inst. for Environmental Protection, Oestfold Research Foundation, 1601 Fredrikstad, Post Box 276, Norway	This paper describes the Norwegian method for Cleaner Production (CP) as well as results and experiences from its use over more than 12 years. Quantifiable results in terms of reduced wastes and emissions and improved material and energy efficiencies have been documented by many authors. Many countries as a strategy for improving environmental performance have also adopted the CP concept. This pa…	Cleaner production methodology; Developing countries; Sustainability; Training modules	Norwegian Department of Environment; Pollution Control Authority; Direktoratet for Utviklingssamarbeid, NORAD	Elsevier Ltd	9596526
LCA	Product	Wood		Krystofik M.; Luccitti A.; Parnell K.; Thurston M.	Adaptive remanufacturing for multiple lifecycles: A case study in office furniture	2018	Resources, Conservation and Recycling	Resour. Conserv. Recycl.	10.1016/j.resconrec.2017.07.028	Golisano Institute for Sustainability (GIS), Rochester Institute of Technology (RIT), Rochester, NY, United States	Remanufacturing has achieved viability in a diversity of industrial markets as a means to both maintain the value of products and minimize waste. From carpet tiling to manufacturing robots, a wide range of goods have presently established supply and consumer networks that support remanufacturing, and thus offer a point of entry into a more circular industrial economy. Based on this performance, i…	Adaptive remanufacturing; Circular economy; Closed-loop supply chain; Multiple lifecycle; Remanufacturing		Elsevier B.V.	9213449
LCA, LCC	Product	Fibers		La Rosa A.D.; Cozzo G.; Latteri A.; Recca A.; Björklund A.; Parrinello E.; Cicala G.	Life cycle assessment of a novel hybrid glass-hemp/thermoset composite	2013	Journal of Cleaner Production	J. Clean. Prod.	10.1016/j.jclepro.2012.11.038	Department of Industrial Engineering, University of Catania, Italy; Environmental Strategies Research-fms, Royal Institute of Technology, KTH, Stockholm, Sweden; Holson Impianti Spa, Priolo (SR), Italy	Bio-based materials have come increasingly into focus during the last years, as alternatives to conventional materials such as fossil-based polymers, metals, and glass. The present paper is an application of life cycle assessment (LCA) methodology in order to explore the possibility of improving the eco efficiency of glass fibre composite materials by replacing part of the glass fibres with hemp …	Epoxy vinyl ester; Hemp mat; Life cycle assessment (LCA); Life cycle costing (LCC); Natural composite			9596526
LCA	By-product	Fibers		Landi D.; Gigli S.; Germani M.; Marconi M.	Investigating the feasibility of a reuse scenario for textile fibres recovered from end-of-life tyres	2018	Waste Management	Waste Manage.	10.1016/j.wasman.2018.02.018	Università Politecnica delle Marche, Via Brecce Bianche, Ancona, 60131, Italy; Università degli Studi della Tuscia, Largo dell'Università, Viterbo, 01100, Italy	The management of end-of-life tyres (ELTs) is regulated by several national and international legislations aiming to promote the recovery of materials and energy from this waste. The three main materials used in tyres are considered: rubber (main product), which is currently reused in other closed-loop applications; steel, which is used for the production of virgin materials; and textile fibres (…	Circular economy; Cost–benefit analysis; End-of-life tyres; Feasibility evaluation; Reuse scenario	European Commission, EC	Elsevier Ltd	0956053X
LCA	Product	Fibers		Le Duigou A.; Deux J.-M.; Davies P.; Baley C.	PLLA/flax mat/balsa bio-sandwich-environmental impact and simplified life cycle analysis	2012	Applied Composite Materials	19	https://www.scopus.com/inward/record.uri?eid=2-s2.0-84863724819&doi=10.1007%2fs10443-011-9201-3&partnerID=40&md5=aa5e3b047f22cff4c80194ee10496d82	Le Duigou A., LIMATB (Laboratoire d'Ingénierie des Matériaux de Bretagne), Université de Bretagne Sud, 56321 Lorient Cedex, France; Deux J.-M., LIMATB (Laboratoire d'Ingénierie des Matériaux de Bretagne), Université de Bretagne Sud, 56321 Lorient Cedex, France; Davies P., IFREMER Materials and Structures Group, 29280 Plouzané CEDEX, France; Baley C., LIMATB (Laboratoire d'Ingénierie des Matériaux…	Balsa; Biopolymer; Natural fibre; Sandwich; Simplified Life Cycle Analysis (SLCA)	Biopolymers; Composite materials; Esters; Glass; Life cycle; Natural fibers; Balsa; Bio-composites; Biocomposite; Glass/polyester; Life cycle analysis; Materials production; PLLA; Reference material; Sandwich; Transport applications; Environmental impact				APCME
LCA	Product	Wood		Li S.; Yuan Y.; Wang J.; Guo M.	Do novel wooden composites provide an environmentally favorable alternative for panel-type furniture?	2019	BioResources	BioResour.	10.15376/biores.14.2.2740-2758	Key Lab of Bio-based Material Science and Technology of Ministry of Education, Material Science and Engineering College, Northeast Forestry University, Harbin, 150040, China; Heilongjiang Bayi Agricultural University, Daqing, 163319, China; Heilongjiang Provincial Key Lab of Environ. Microbiology, Recycling of Argo-Waste in Cold Region, College of Life Science and Technology, Heilongjiang Bayi Ag…	The environmental performance was assessed for a wardrobe made from hybrid modified ammonium lignosulfonate/wood fiber composites (HWC). The HWC wardrobe system involved four subsystems, namely the raw materials supply, energy consumption, wardrobe manufacturing, and transportation. A comparative life cycle assessment of a wardrobe built from conventional medium-density fiberboard with three prim…	HMAL/WF composites (HWC); Life cycle assessment (LCA); Medium-density fiberboard (MDF); Sustainability; Wooden furniture		North Carolina State University	19302126
LCA, LCC	Energy	Food		Liu T.; Liu H.; Wei G.; Zhao H.; Gong Y.; Guo X.; Zhang Y.	Comprehensive assessment of food waste treatment emission reduction in China: a life cycle perspective	2023	Environmental Science and Pollution Research	Environ. Sci. Pollut. Res.	10.1007/s11356-023-28622-6	College of Energy and Safety Engineering, Tianjin Chengjian University, Tianjin, 300384, China; Faculty of Materials and Manufacturing, Beijing University of Technology, Beijing, 100124, China; College of Science, Tianjin Chengjian University, Tianjin, 300384, China; State Key Joint Laboratory of Environment Simulation and Pollution Control (SKLESPC), School of Environment, Tsinghua University, B…	Food waste (FW) treatment has attracted increasing attention since waste classification occurred in China. Analyzing the environmental and economic impacts of different FW treatment technologies is required. In this study, four FW treatments, i.e., anaerobic digestion, black soldier fly (BSF) bioconversion, composting, and landfill, were evaluated using life cycle assessment (LCA) and life cycle …	Anaerobic digestion; Emission reduction; Food waste disposer; Life cycle assessment; Life cycle cost; Resource utilization rate	Tianjin Technology Major Project and Engineering, (18ZXSZSF0012)	Springer Science and Business Media Deutschland GmbH	9441344
LCA	Product	Fibers		Liu Y.; Huang H.; Zhu L.; Zhang C.; Ren F.; Liu Z.	Could the recycled yarns substitute for the virgin cotton yarns: a comparative LCA	2020	International Journal of Life Cycle Assessment	Int. J. Life Cycle Assess.	10.1007/s11367-020-01815-8	School of Mechanical Engineering, Hefei University of Technology, 193 Tunxi Road, Hefei, 230009, China; Key Laboratory of Green Design and Manufacturing of Mechanical Industry, Hefei University of Technology, 193 Tunxi Road, Hefei, 230009, China; School of Mechanical Engineering, Nantong University, 9 Seyuan Road, Nantong, 226019, China	Purpose: Cotton yarns spun from natural fibers are widely used in the apparel industry. Most of waste cotton goods are now disposed by incineration or landfill, which brings resource and environmental challenges to the society. Using the waste cotton to spin yarns is an alternative way to forward a more sustainable future. In this research, two scenarios for the environmental impacts of yarns spu…	Environmental impact; Life cycle assessment; Recycled cotton yarns; Spinning; Virgin cotton yarns	National Natural Science Foundation of China, NSFC, (51722502)	Springer Science and Business Media Deutschland GmbH	9483349
LCA	Product	Fibers		Liu Y.; Zhu L.; Zhang C.; Ren F.; Huang H.; Liu Z.	Life cycle assessment of melange yarns from the manufacturer perspective	2020	International Journal of Life Cycle Assessment	Int. J. Life Cycle Assess.	10.1007/s11367-019-01705-8	Key Laboratory of Green Design and Manufacturing of Mechanical Industry, Hefei University of Technology, 193 Tunxi Road, Hefei, 230009, China; School of Mechanical Engineering, Hefei University of Technology, 193 Tunxi Road, Hefei, 230009, China; School of Mechanical Engineering, Nantong University, 9 Seyuan Road, Nantong, 226019, China	Purpose: Different proportions of colored fibers are able to spin into melange yarns with different colors and textures. With the advantages of energy saving, water saving, and emissions reduction in their production, melange yarns become more and more popular in manufacturers. However, the environmental performance of melange yarns with different colors has not been well investigated, which make…	Colored fibers; Dyeing; Environmental impacts; Life cycle assessment; Melange yarns; Spinning	National Natural Science Foundation of China, NSFC, (51722502)	Springer	9483349
LCA	Energy	Other		Lugato E.; Vaccari F.P.; Genesio L.; Baronti S.; Pozzi A.; Rack M.; Woods J.; Simonetti G.; Montanarella L.; Miglietta F.	An energy-biochar chain involving biomass gasification and rice cultivation in Northern Italy	2013	GCB Bioenergy	GCB Bioenergy	10.1111/gcbb.12028	IBIMET-CNR, Institute of Biometeorology, National Research Council, Firenze 50145, Via G. Caproni, 8, Italy; European Commission, JRC, Ispra (VA), I-21027, Via E. Fermi, 2749, Italy; AGT - Advanced Gasification Technology, Cremona, 26100, Via Cesari, 1/A, Italy; Centre for Environmental Policy, Imperial College London, South Kensington, London, SW7 2AZ, United Kingdom; DAFNAE - Department of Agro…	The competing demand for food and bioenergy requires new solutions for the agricultural sector as, for instance, the coupling of energy production from gasification technology and the application of the resulting biochar as soil amendment. A prerequisite for the implementation of this strategy is the scale-specific assessment of both the energetic performance and of the impacts in terms of greenh…	Biochar; Energy-biochar chain; Gasification; Life cycle assessment; Paddy rice; Rice yield	Seventh Framework Programme, FP7, (265179)	Blackwell Publishing Ltd	17571693
LCA, S-LCA	Manufacture	Fashion and furniture		Martin M.; Herlaar S.	Environmental and social performance of valorizing waste wool for sweater production	2021	Sustainable Production and Consumption	25	https://www.scopus.com/inward/record.uri?eid=2-s2.0-85097532485&doi=10.1016%2fj.spc.2020.11.023&partnerID=40&md5=63bf87d360d7d0bd5571da1a77176ecd	Martin M., IVL Swedish Environmental Research Institute, Life Cycle Management, Sustainable Society, Valhallavägen 81, Stockholm, 114 27, Sweden, KTH Royal Institute of Technology, Department of Sustainable Development, Environmental Science and Engineering (SEED), Teknikringen 10b, Stockholm, 114 28, Sweden; Herlaar S., IVL Swedish Environmental Research Institute, Life Cycle Management, Sustain…		Garment industry; Life cycle; Manufacture; Supply chains; Textile industry; Wool; Yarn; Business models; Life Cycle Assessment (LCA); Manufacturing facility; Production sites; Social implication; Social performance; Social responsibilities; Social risks; Environmental impact	Funding text 1: This work was funded by the Swedish Environmental Protection Agency, Naturvårdsverket, through the project “LinCS – Linking circularity metrics at product and society level,” and FORMAS grant 2017-00263, without which this study could not have been possible. ; Funding text 2: We would like to send our gratitude to the anonymous reviewers who have extensively improved the article. …
LCA, LCC	Method	Food		Mathioudakis D.; Karageorgis P.; Papadopoulou K.; Astrup T.F.; Lyberatos G.	Environmental and Economic Assessment of Alternative Food Waste Management Scenarios	2022	Sustainability (Switzerland)	Sustainability	10.3390/su14159634	School of Chemical Engineering, National Technical University of Athens, Iroon Polytechneiou 9, Zografou, Athens, 15780, Greece; Department of Environmental and Resource Engineering, Technical University of Denmark, Kgs Lyngby, 2800, Denmark; Institute of Chemical Engineering Sciences (ICE-HT), Stadiou Str., Platani, Patras, 26504, Greece	The scope of this paper was to examine the environmental and economic performance of alternative household fermentable waste (HFW) management scenarios. In Greece, the business-as-usual scheme for the management of HFW is its disposal in landfills as part of mixed waste. Within a HORIZON2020 called Waste4think a series of alternative approaches based on the benefits of source separation was devel…	EASETECH; food waste; LCA; LCC; valorization	Horizon 2020, (688995)	MDPI	20711050
LCA, LCC	System	Waste		Mathioudakis D.; Karageorgis P.; Papadopoulou K.; Lyberatos G.	LCA and LCC of dried and shredded food waste as an alternative fuel for the cement industry	2021	Waste Management and Research	Waste Manage. Res.	10.1177/0734242X21992416	School of Chemical Engineering, National Technical University of Athens, Zografou, Athens, Greece; Institute of Chemical Engineering Sciences (ICE-HT), Platani, Patras, Greece	The scope of this paper is to examine the environmental and economic performance of an alternative household fermentable waste (HFW) management paradigm, developed within the framework of the HORIZON 2020 project Waste4think. In Greece, the business-as-usual scheme for the management of HFW is its disposal in landfills as part of mixed waste. Waste4think developed an alternative approach based on…	alternative fuel; cement industry; Household fermentable waste; life cycle assessment; life cycle costing		SAGE Publications Ltd	0734242X
LCA	Product	Wood		Medeiros D.L.; Tavares A.O.C.; Rapôso Á.L.Q.R.S.; Kiperstok A.	Life cycle assessment in the furniture industry: the case study of an office cabinet	2017	International Journal of Life Cycle Assessment	Int. J. Life Cycle Assess.	10.1007/s11367-017-1370-3	Industrial Engineering Graduate Program (PEI), Federal University of Bahia (UFBA), Aristides Novis Street 2 (6th floor) Federação, Salvador, 40210-630, BA, Brazil; National Service of Industrial Learning (SENAI CIMATEC), Orlando Gomes Avenue 1845 Piatã, Salvador, 41650-010, BA, Brazil; Design Research Center (NPDesign), Federal Institute of Alagoas (IFAL), Odilon Vasconcelos Street 103 Jatiúca, M…	Purpose: In an effort to reduce the environmental impacts of the furniture sector, this study aimed to diagnose the environmental performance of an office cabinet throughout its life cycle. Methods: An attributional life cycle assessment (LCA) was used, based on the ISO 14044 Standard and ILCD Handbook. The scope of the study considered the entire supply chain, from cradle to grave, including the…	Biogenic carbon; End-of-life; Life cycle assessment (LCA); Office furniture; Sensitivity analysis; Transport distance	Coordenação de Aperfeiçoamento de Pessoal de Nível Superior, CAPES; Conselho Nacional de Desenvolvimento Científico e Tecnológico, CNPq	Springer Verlag	9483349
LCA	Energy	Other		Moretti C.; Vera I.; Junginger M.; López-Contreras A.; Shen L.	Attributional and consequential LCAs of a novel bio-jet fuel from Dutch potato by-products	2022	Science of the Total Environment	Sci. Total Environ.	10.1016/j.scitotenv.2021.152505	Utrecht University, Copernicus Institute of Sustainable Development, Utrecht, Netherlands; Wageningen University & Research, Food & Biobased Research, Wageningen, Netherlands	To mitigate the climate change impact of aviation, jet fuels from bio-based by-products are considered a promising alternative to conventional jet fuels. Life cycle assessment (LCA) is a commonly applied tool to determine the environmental impacts of bio-jet fuels. This article presents both attributional and consequential LCA models to assess an innovative bio-jet fuel produced from potato by-pr…	Biofuel; Jet fuel; Life cycle assessment; LUC; Multifunctionality	Ministerie van Economische Zaken en Klimaat, EZK, (TEBE116223)	Elsevier B.V.	489697
LCA, LCC	Manufacture	Fashion and furniture		N Gkoloni, C Golonis, V Kostopoulos	Integration of LCA and LCC for decision making in biocomposite production	2022	IOP Conference Series: Earth and Environmental Science		10.1088/1755-1315/1123/1/012071	Department of Mechanical Engineering & Aeronautics, University of Patras, University Campus Pion, Patras, 26504, Greece
LCA	Method	Fashion and furniture		Na D.-K.; Kim J.; Kim M.; Na Y.	Improvement of consumer's reliability on the eco label by suggestion of quantifying rating system	2017	Journal of the Korean Society of Clothing and Textiles	J. Korean Soc. Cloth. Text.	10.5850/JKSCT.2017.41.5.783	Dept. of Law, Graduate School, Hongik University, South Korea; Dept. of Clothing and Textiles, Inha University, South Korea	This study measured consumer's recognition, reliability, emotion and images about current eco-marks as well proposed an eco-mark rating scale and mark designs to improve consumer's trust on the fashion product marks. We used a questionnaire survey to collect data from 150 persons about knowledge, interests, and practice on eco fashion products in relation to trustfulness and positive images for t…	Eco knowledge; Energy-consumption efficiency mark; LCA; Mark reliability; Rating mark		Korean Society of Clothing and Textiles	12251151
LCSA	Method	Other		Onat N.C.; Kucukvar M.; Tatari O.	Integrating triple bottom line input-output analysis into life cycle sustainability assessment framework: The case for US buildings	2014	International Journal of Life Cycle Assessment	19	https://www.scopus.com/inward/record.uri?eid=2-s2.0-84904730053&doi=10.1007%2fs11367-014-0753-y&partnerID=40&md5=8f9f70ff56304029b8fed8b42deae3e6	Onat N.C., Department of Civil, Environmental, and Construction Engineering, University of Central Florida, Orlando, FL 32816, 4000 Central Florida Blvd, United States; Kucukvar M., Department of Civil, Environmental, and Construction Engineering, University of Central Florida, Orlando, FL 32816, 4000 Central Florida Blvd, United States; Tatari O., Department of Civil, Environmental, and Construc…	Buildings; Economic input-output analysis; Life cycle sustainability assessment; Monte Carlo simulation; Triple bottom line	fossil fuel; natural gas; article; building; combustion; construction work; controlled study; electricity; energy consumption; environmental impact; environmental sustainability; fishery; forestry; grazing; greenhouse gas; hazardous waste; income; life cycle assessment; life cycle sustainability assessment; methodology; priority journal; sensitivity analysis; socioeconomics; triple bottom line; U…				IJLCF
LCA	Product	Wood		Panameño R.; Gutiérrez-Aguilar C.M.; Angel B.E.; Fábio-César S.; Kiperstok A.	Cleaner production and LCA as complementary tools in environmental assessment: Discussing tradeoffs assessment in a case of study within the wood sector in Brazil	2019	Sustainability (Switzerland)	Sustainability	10.3390/su11185026	Postgraduate Program in Industrial Engineering (PEI), Federal University of Bahia (UFBA), Salvador, 40210-630, Brazil; Engineering and Architecture Faculty, Operations and Systems Department, Central American University José Simeón Cañas (UCA), San Salvador, CP1101, El Salvador; Arts and Humanities Faculty, Design Department, Metropolitan Technological Institute (ITM), Medellin, 050036, Colombia;…	Cleaner production has been used for several years in Latin America to minimize waste generation while reducing material and energy consumption. Despite those environmental benefits, its implementation may sometimes lead to changes in products or processes whose environmental performance can yield either positive or negative outputs when examined within a broader context, meaning it is necessary …	Cleaner production; Cumulative energy demand; Design for sustainability; Furniture; ILCD 2011; Life cycle assessment; Tradeoffs; Wood industry	Central American University; Federal University of Bahia; University for the Creative Arts, UCA; Coordenação de Aperfeiçoamento de Pessoal de Nível Superior, CAPES	MDPI	20711050
LCA	End of life	Fashion and furniture		Paras M.K.; Pal R.	Application of Markov chain for LCA: a study on the clothes ‘reuse’ in Nordic countries	2018	International Journal of Advanced Manufacturing Technology	Int J Adv Manuf Technol	10.1007/s00170-017-0845-5	Department of Business Administration and Textile Management, University of Boras, Allegatan 1, Boras, SE-501 90, Sweden; Faculty of Textiles, Leather and Industrial Management, Gheorghe Asachi Technical University of Iasi, Bulevardul Profesor Dimitrie Mangeron 67, Iasi, 700050, Romania; School of Textile and Clothing Engineering, Soochow University, Suzhou, 215021, China	The purpose of this paper is to develop a model to count the number of cycles or trips that a clothing product could make in a reuse-based closed loop cycle. The model is primarily based on three scenarios: (i) self-reuse (ii) discard to second-hand market and (iii) disposed to incineration or the recycling stations. The present study extended and complemented the existing literature by presentin…	Closed loop; Fashion value chain; Markov chain; Reuse; Textile waste		Springer London	2683768
LCA	By-product	Fashion and furniture		Pegoretti T.D.S.; Mathieux F.; Evrard D.; Brissaud D.; Arruda J.R.D.F.	Use of recycled natural fibres in industrial products: A comparative LCA case study on acoustic components in the Brazilian automotive sector	2014	Resources, Conservation and Recycling	Resour. Conserv. Recycl.	10.1016/j.resconrec.2013.12.010	State University of Campinas (UNICAMP), Department of Computational Mechanics, Cidade Universitária Zeferino Vaz, Barão Geraldo, 13083-970 Campinas, SP, rua Mendeleyev, 200, Brazil; Université de Grenoble, G-SCOP, 38031 Grenoble Cedex 1, 46 avenue Félix Viallet, France; European Commission, Joint Research Centre, Institute for Environment and Sustainability, I-21027 Ispra, VA, Via E. Fermi 2749, …	This paper summarizes the results and the lessons learnt from an LCA case study comparing acoustic automotive components. Three alternative acoustic components produced by the Brazilian automotive sector are considered: dual-layer polyurethane (DL-PU) panel, recycled textile absorption-barrier- absorption (ABA-cotton) panel and recycled textile DL (DL-cotton) panel. DL-PU is a "status-quo" altern…	Automotive acoustic panel; Life Cycle Assessment; Recycled cotton fibres; Renewable fibres	European Commission, EC; Coordenação de Aperfeiçoamento de Pessoal de Nível Superior, CAPES, (2299/11-9); Conselho Nacional de Desenvolvimento Científico e Tecnológico, CNPq	Elsevier B.V.	9213449
LCA, LCC	Manufacture	Waste		Persiani A.; Pergola M.; Ingrao C.; Palese A.M.; Celano G.	Supply of agricultural biomass residues for on-farm composting: a cross-analysis of relevant data sets for the most sustainable management combination	2021	Agroecology and Sustainable Food Systems	Agroecology Sustainable Food Syst.	10.1080/21683565.2020.1787294	Ages s.r.l. s - Spin-off Accademico, Università Degli Studi Della Basilicata, Potenza, Italy; Facoltà Di Ingegneria e Architettura, Università Degli Studi Di Enna “Kore”, Enna, Italy; Degree Course of Agriculture, Dipartimento Di Farmacia (DIFARMA), Università Degli Studi Di Salerno, Fisciano, SA, Italy	Agricultural crop production can generate significant residues and their management is generally a disposal problem. Composting can be a solution. It is essentially an efficient bioconversion technique to process organic wastes (manure, food, crop and forestry residues, solid digestate) into humus-like substances destined to different uses (soil amendment, organic fertilization, plant nursery sub…	bulking agents; composting process; energy analysis; LCA; LCC; Organic wastes		Taylor and Francis Ltd.	21683565
LCA	End of life	Fibers		Peters G.M.; Sandin G.; Spak B.	Environmental Prospects for Mixed Textile Recycling in Sweden	2019	ACS Sustainable Chemistry and Engineering	ACS Sustainable Chem. Eng.	10.1021/acssuschemeng.9b01742	Division of Environmental Systems Analysis, Chalmers University of Technology, Gothenburg, 41296, Sweden; RISE Research Institutes of Sweden, Gothenburg, SE412 61, Sweden	The production of cotton and other fibers causes excessive resource use and environmental impacts, and the deployment of these fibers in "fast fashion" is creating large masses of textile waste. Therefore, various industrial researchers are attempting to develop systems to recycle cellulosic materials. This is a challenging undertaking because of the need to handle mixed waste streams. Alkaline h…	Alkaline hydrolysis; Chemical recycling; Cotton; Fiber recycling; Life cycle assessment; Polyester		American Chemical Society	21680485
LCT	Method	Other		Petit-Boix A.; Llorach-Massana P.; Sanjuan-Delmás D.; Sierra-Pérez J.; Vinyes E.; Gabarrell X.; Rieradevall J.; Sanyé-Mengual E.	Application of life cycle thinking towards sustainable cities: A review	2017	Journal of Cleaner Production	J. Clean. Prod.	10.1016/j.jclepro.2017.08.030	Sostenipra (ICTA-IRTA-Inèdit; 2014 SGR 1412), Institute of Environmental Science and Technology (ICTA; Unidad de excelencia «María de Maeztu» (MDM-2015-0552)), Universitat Autònoma de Barcelona (UAB), Edifici ICTA-ICP, Carrer de les Columnes, Bellaterra, Barcelona, 08193, Spain; ELISAVA Barcelona School of Design and Engineering, La Rambla 30-32, Barcelona, 08002, Spain; Centro Universitario de l…	Defining sustainable cities is not straightforward. The main issues involved in urban sustainability are buildings, energy, food, green areas and landscape, mobility, urban planning, water and waste; and their improvement is promoted through different strategies. However, a quantitative method, such as life cycle thinking (LCT), is essential to evaluating these strategies. This paper reviews LCT …	Life cycle assessment; Life cycle thinking; Sustainability; Sustainable policy; Urban metabolism	Ministerio de Economía y Competitividad, MINECO, (MDM-2015-0552); Centro Universitario de la Defensa de Zaragoza, CUD, (2015-11)	Elsevier Ltd	9596526
LCA	Product	Fibers		Peydayesh M.; Bagnani M.; Mezzenga R.	Sustainable Bioplastics from Amyloid Fibril-Biodegradable Polymer Blends	2021	ACS Sustainable Chemistry and Engineering	ACS Sustainable Chem. Eng.	10.1021/acssuschemeng.1c03937	Department of Health Sciences and Technology, Eth Zurich, Zurich, 8092, Switzerland; Department of Materials, Eth Zurich, Zurich, 8093, Switzerland	Plastics waste production is a global challenging problem because its accumulation in the environment causes devastating effects on the planet's ecosystem. Sustainable and green solutions are urgently needed, and this pairs with increasingly stronger regulations combined with improved ecological awareness. This study proposes a simple, scalable, and water-based process to produce free-standing, t…	amyloid fibrils; bioplastics; circular economy; sustainability; waste valorization		American Chemical Society	21680485
LCA	Energy	Food		Pourbafrani M.; McKechnie J.; Maclean H.L.; Saville B.A.	Life cycle greenhouse gas impacts of ethanol, biomethane and limonene production from citrus waste	2013	Environmental Research Letters	Environ.Res.Lett.	10.1088/1748-9326/8/1/015007	Department of Chemical Engineering and Applied Chemistry, University of Toronto, Toronto, ON M5S 3E5, 200 College Street, Canada; Division of Energy and Sustainability, University of Nottingham, Nottingham NG7 2RD, University Park, United Kingdom; Department of Civil Engineering, University of Toronto, Toronto, ON M5S 1A4, 35 St George Street, Canada	The production of biofuel from cellulosic residues can have both environmental and financial benefits. A particular benefit is that it can alleviate competition for land conventionally used for food and feed production. In this research, we investigate greenhouse gas (GHG) emissions associated with the production of ethanol, biomethane, limonene and digestate from citrus waste, a byproduct of the…	biofuel; citrus waste; life cycle assessment; limonene		Institute of Physics Publishing	17489326
LCA	Energy	Food		Rajendran N.; Kang D.; Han J.; Gurunathan B.	Process optimization, economic and environmental analysis of biodiesel production from food waste using a citrus fruit peel biochar catalyst	2022	Journal of Cleaner Production	J. Clean. Prod.	10.1016/j.jclepro.2022.132712	School of Semiconductor and Chemical Engineering, Jeonbuk National University, Jeonju, 54896, South Korea; School of Chemical Engineering, Jeonbuk National University, Jeonju, 54896, South Korea; Department of Biotechnology, St. Joseph's College of Engineering, Chennai, 600119, India	The concept of sustainably reusing food waste to produce value-added byproducts, such as biodiesel, was studied. Food waste is an organic-rich source of lipids. An optimization study of the extraction of oil from food waste using a solvent for biodiesel production was undertaken. A biochar catalyst derived from citron (Citrus medica) peel containing a rich carbon source. A biodiesel yield of 96.3…	Biochar catalyst; Biodiesel; Food waste; Lifecycle assessment; Techno-economic analysis	Ministry of Science, ICT and Future Planning, MSIP, (2020M1A2A2080858, 2020M3H7A1096361, 2022R1C1C1003329); National Research Foundation of Korea, NRF	Elsevier Ltd	9596526
LCA	Method	Other		Ribeiro I.; Sobral P.; Peças P.; Henriques E.	A sustainable business model to fight food waste	2018	Journal of Cleaner Production	J. Clean. Prod.	10.1016/j.jclepro.2017.12.200	IDMEC, Instituto Superior Técnico, Lisbon University, Av. Rovisco Pais, Lisbon, 1049-001, Portugal	Food waste is major problem in developed countries, with the latest studies pointing to one third of the food produced worldwide. This problem occurs throughout the food value stream and has economic, environmental and social consequences. This study focuses on a solution developed in Portugal for a specific type of waste, vegetables and fruits discarded by farmers due to aesthetic reasons. Altho…	Food waste; Life Cycle Assessment (LCA); Life Cycle Cost (LCC); Social Return on Investment (SROI); Social-Life Cycle Assessment (SLCA); Sustainable business model	European Commission LIFE	Elsevier Ltd	9596526
LCA	Manufacture	Wood		Russell J.D.; Huff K.; Haviarova E.	Evaluating the cascading-use of wood furniture: How value-retention processes can contribute to material efficiency and circularity	2023	Journal of Industrial Ecology	J. Ind. Ecol.	10.1111/jiec.13284	Department of Sustainable Biomaterials, Virginia Polytechnic Institute & State University, Blacksburg, VA, United States; Department of Forestry and Natural Resources, Purdue University, West Lafayette, IN, United States	As utilized technical products, durable wood furniture plays an important role in a future circular economy (CE). However, contemporary CE literature predominantly focuses on wood's biochemical properties and its potential as a consumable material within the bio-cycle. This perspective prevents meaningful consideration of CE strategies for the wood products sector, particularly for value-retentio…	bio-based products; circular economy; impact assessment; industrial ecology; modeling; value-retention processes		John Wiley and Sons Inc	10881980
LCA	Method	Waste		Sakai S.-I.; Yano J.; Hirai Y.; Asari M.; Yanagawa R.; Matsuda T.; Yoshida H.; Yamada T.; Kajiwara N.; Suzuki G.; Kunisue T.; Takahashi S.; Tomoda K.; Wuttke J.; Mählitz P.; Rotter V.S.; Grosso M.; Astrup T.F.; Cleary J.; Oh G.-J.; Liu L.; Li J.; Ma H.-W.; Chi N.K.; Moore S.	Waste prevention for sustainable resource and waste management	2017	Journal of Material Cycles and Waste Management	J. Mater. Cycles Waste Manage.	10.1007/s10163-017-0586-4	Kyoto University Environment Preservation Research Center, Kyoto, Japan; Kyoto University Graduate School of Global Environmental Studies, Kyoto, Japan; Japan Environment Safety Corporation, Tokyo, Japan; Environment Policy Bureau, City of Kyoto, Kyoto, Japan; National Institute for Environmental Studies, Tsukuba, Japan; Ehime University, Matsuyama, Japan; TOWA Technology Corporation, Higashihiro…	Although the 2Rs (reduce and reuse) are considered high-priority approaches, there has not been enough quantitative research on effective 2R management. The purpose of this paper is to provide information obtained through the International Workshop in Kyoto, Japan, on 11–13 November 2015, which included invited experts and researchers in several countries who were in charge of 3R policies, and an…	Chemical control; Circular economy; Life-cycle assessment (LCA); Life-cycle cost (LCC); Material flow analysis (MFA); Resource efficiency; Review; Substance flow analysis (SFA); Waste prevention		Springer Tokyo	14384957
LCA	Manufacture	Wood		Sakib M.N.; Kabir G.; Ali S.M.	A life cycle analysis approach to evaluate sustainable strategies in the furniture manufacturing industry	2024	Science of the Total Environment	Sci. Total Environ.	10.1016/j.scitotenv.2023.167611	Industrial Systems Engineering, University of Regina, Regina, Regina, S4S 0A2, SK, Canada; Department of Industrial and Production Engineering, Bangladesh University of Engineering and Technology, Dhaka, 1000, Bangladesh	Life Cycle Assessment (LCA) plays a crucial role in sustainability evaluations and impact assessments, especially in the realm of eco-design and environmentally friendly manufacturing in the furniture sector. However, the existing research tends to focus on specific stages of the furniture life cycle and leaves a substantial portion of the environmental impact unaddressed, including resource cons…	Cost analysis; Furniture industry; Life cycle assessment; Sustainable strategies		Elsevier B.V.	489697
LCA	End of life	Fashion and furniture		Sandin G.; Peters G.M.	Environmental impact of textile reuse and recycling – A review	2018	Journal of Cleaner Production	J. Clean. Prod.	10.1016/j.jclepro.2018.02.266	RISE Research Institutes of Sweden, Eklandagatan 86, Gothenburg, 412 61, Sweden; Chalmers University of Technology, Gothenburg, 412 96, Sweden; School of Civil and Environmental Engineering, University of New South Wales, Australia	This paper reviews studies of the environmental impact of textile reuse and recycling, to provide a summary of the current knowledge and point out areas for further research. Forty-one studies were reviewed, whereof 85% deal with recycling and 41% with reuse (27% cover both reuse and recycling). Fibre recycling is the most studied recycling type (57%), followed by polymer/oligomer recycling (37%)…	Circular economy; Clothing; Collaborative consumption; LCA; Life cycle assessment; Waste management	Mistra Future Fashion; Stiftelsen för Miljöstrategisk Forskning; Horizon 2020 Framework Programme, H2020; Horizon 2020, (646226)	Elsevier Ltd	9596526
LCA	Energy	Waste		Santagata R.; Ripa M.; Ulgiati S.	An environmental assessment of electricity production from slaughterhouse residues. Linking urban, industrial and waste management systems	2017	Applied Energy	Appl. Energy	10.1016/j.apenergy.2016.07.073	Parthenope University of Naples, Italy; School of Environment, Beijing Normal University, China	The food processing industry continues to grow, generating large amount of organically rich waste flows per year: these processors face significant economic and environmental pressures for appropriate conversion and disposal of these waste flows. Solid waste disposal problems, mostly in highly urbanized environments, energy shortages (primarily oil) and/or high petroleum prices, as well as enviro…	Animal by-products; Circular economy; Electricity production; LCA; Urban waste management	School of Environment; Horizon 2020 Framework Programme, H2020, (EE-12-2014, H2020-EE-2014-2-RIA); European Commission, EC; Beijing Normal University, BNU	Elsevier Ltd	3062619
LCA	Energy	Other		Shahzad K.; Nizami A.S.; Sagir M.; Rehan M.; Maier S.; Khan M.Z.; Ouda O.K.M.; Ismail I.M.I.; BaFail A.O.	Biodiesel production potential from fat fraction of municipal waste in Makkah	2017	PLoS ONE	PLoS ONE	10.1371/journal.pone.0171297	Center of Excellence in Environmental Studies (CEES), King Abdulaziz University, Jeddah, Saudi Arabia; Chemical Engineering Department, University of Gujrat, Gujrat, Pakistan; Institute for Process and Particle Engineering, Graz University of Technology, Graz, Austria; Environmental Research Laboratory, Department of Chemistry, Aligarh Muslim University, Aligarh, Uttar Pradesh, India; Department …	In the Kingdom of Saudi Arabia (KSA), millions of Muslims come to perform Pilgrimage every year. Around one million ton of municipal solid waste (MSW) is generated in Makkah city annually. The collected MSW is disposed of in the landfills without any treatment or energy recovery. As a result, greenhouse gas (GHG) emissions and contamination of the soil and water bodies along with leachate and odo…			Public Library of Science	19326203
LCA, SCBA	Energy	Other		Shanmugam K.; Baroth A.; Nande S.; Yacout D.M.M.; Tysklind M.; Upadhyayula V.K.K.	Social cost benefit analysis of operating compressed biomethane (CBM) transit buses in cities of developing nations: A case study	2019	Sustainability (Switzerland)	Sustainability	10.3390/su11154190	Department of Chemistry, Umea University, Umea, SE 90187, Sweden; Department of Habitat Ecology, Wild Life Institute of India, Uttarakhand, 248002, India; Engineering Research Center, TATA Motors, Pune, 411016, India	Cities in developing nations have to deal with two significant sustainability challenges amidst rampant urbanization. First, consumer-generated food waste is increasing monumentally since open dumping is still followed as a predominant practice, the negative environmental externalities associated with food waste disposal are growing beyond manageable proportions. Second, the dependency on convent…	Compressed biomethane for transit buses; Food waste management in cities of developing nations; Life cycle assessment; Private and sustainable rate of returns; Social cost benefit analysis	Green Technologies and Environmental Economics; Khalid Aljubori; Umea Municipality; Umea University	MDPI	20711050
LCA	Product	Fashion and furniture		Silva L.F.C.; Silva M.E.; Brás I.; Domingos I.; Wessel D.; Ferreira J.V.	A Cradle-to-Grave Life Cycle Assessment Study on a New Countertop Material	2021	Journal of Ecological Engineering	J. Ecol. Eng.	10.12911/22998993/142947	ESTGV, Instituto Politécnico de Viseu, Campus Politécnico de Repeses, Viseu, Portugal; Centre for Research in Digital Services, Polytechnic Institute of Viseu, Viseu, Portugal; Laboratory for Process Engineering, Environment, Biotechnology and Energy, Instituto Politécnico de Viseu, Campus Politécnico de Repeses, Viseu, Portugal; Research Center for Natural Resources, Environment and Society, Ins…	The life cycle of furniture products has been decreased in the last years as a consequence of the continuous improvement of people’s housing conditions. This behavior increases the waste amount in an urban area. The focus of this study was developing a Life Cycle Assessment (LCA) (cradle-to-grave) of a new countertop product. Two scenarios for countertop waste management were proposed, one consid…	circular economy; furniture; life cycle assessment; recycling	CERNAS; Polytechnic of Viseu; Research Centre for Natural Resources, Environment and Society, (UIDB/00681/2020); Fundação para a Ciência e a Tecnologia, FCT; Instituto Politécnico de Viseu, IPV	Polskie Towarzystwo Inzynierii Ekologicznej (PTIE)	22998993
LCA, LCC	Method	Food		Takata M.; Fukushima K.; Kino-Kimata N.; Nagao N.; Niwa C.; Toda T.	The effects of recycling loops in food waste management in Japan: Based on the environmental and economic evaluation of food recycling	2012	Science of the Total Environment	Sci. Total Environ.	10.1016/j.scitotenv.2012.05.049	Graduate School of Engineering, Soka University, Hachioji, Tokyo 192-8577, Japan; Watanabe Oyster Laboratory Co. Ltd, Hachioji, Tokyo 192-0154, Japan; Institute of Bioscience, Universiti Putra Malaysia, 43400 UPM Serdang, Selangor, Malaysia	In Japan, a revised Food Recycling Law went into effect in 2007 to promote a "recycling loop" that requires food industries to purchase farm products that are grown using food waste-derived compost/animal feed. To realize and expand food recycling, it is necessary to evaluate how the recycling facilities work in the recycling loop. The purpose of this study is to assess the environmental and econ…	Animal feed; Bio-gasification; Composting; Life cycle assessment; Life cycle cost; Recycling loop	Center of Excellence for Private Universities; Japan's Ministry of Education, Culture, Science and Technology		18791026
LCA	By-product	Food		Tsouko E.; Pilafidis S.; Dimopoulou M.; Kourmentza K.; Sarris D.	Bioconversion of underutilized brewing by-products into bacterial cellulose by a newly isolated Komagataeibacter rhaeticus strain: A preliminary evaluation of the bioprocess environmental impact	2023	Bioresource Technology	Bioresour. Technol.	10.1016/j.biortech.2023.129667	Theoretical and Physical Chemistry Institute, National Hellenic Research Foundation, 48 Vassileos Constantinou Ave., Athens, 11635, Greece; Department of Food Science & Nutrition, School of Environment, University of the Aegean, Leoforos Dimokratias 66, Lemnos, Myrina, 81400, Greece; Department of Wine, Vine and Beverage Sciences, School of Food Science, University of West Attica, Ag. Spyridonos …	A novel Komagataeibacter rhaeticus UNIWA AAK2 strain was used to produce bacterial cellulose (BC), valorizing brewers’ spent grain (BSG) and brewer's spent yeast (BSY). Under optimal conditions (controlled pH = 6 and 30 g/L sugars), a maximum BC of 4.0 g/L was achieved when BSG aqueous extract (BSGE) was used. The substitution of yeast extract and peptone with BSY autolyzates did not show signifi…	Biomass residues; Brewing industry; Carbon footprint; Sustainable biopolymers	H.F.R.I.; Hellenic Foundation for Research and Innovation, ΕΛ.ΙΔ.Ε.Κ, (7664)	Elsevier Ltd	9608524
LCSA	Method	Other		Vinyes E.; Oliver-Solà J.; Ugaya C.; Rieradevall J.; Gasol C.M.	Application of LCSA to used cooking oil waste management	2013	International Journal of Life Cycle Assessment	Int. J. Life Cycle Assess.	10.1007/s11367-012-0482-z	SosteniPrA (ICTA-IRTA-Inèdit), Institute of Environmental Science and Technology, Universitat Autònoma de Barcelona (UAB), 08193 Bellaterra, Cerdanyola del Vallès, Spain; Inèdit Innovació S.L., Universitat Autònoma de Barcelona (UAB), Research Park, 08348 Cabrils, Barcelona, Carretera de Cabrils km., Spain; Universidade Tecnologica Federal Do Parana (UTFPR) Itapicuru, 3165 Rebouças Curitiba, PR, …	Purpose: Used cooking oil (UCO) is a domestic waste generated as the result of cooking and frying food with vegetable oil. The purpose of this study is to compare the sustainability of three domestic UCO collection systems: through schools (SCH), door-to-door (DTD), and through urban collection centres (UCC), to determine which systems should be promoted for the collection of UCO in cities in Med…	Life cycle assessment (LCA); Life cycle costing (LCC); Social assessment; Sustainability	European Commission, EC, (LIFE11 ENV/ES/557, PTQ-10-02528)	Springer Verlag	9483349
LCA, LCC	Energy	Food		Wang C.; Zhang L.; Chang Y.; Hao Y.	Converting waste cooking oil to biodiesel in China: Environmental impacts and economic feasibility	2021	Renewable and Sustainable Energy Reviews	Renewable Sustainable Energy Rev	10.1016/j.rser.2020.110661	State Key Joint Laboratory of Environmental Simulation and Pollution Control, School of Environment, Beijing Normal University, Beijing, 100875, China; The Chinese Academy for Environmental Planning, Beijing, 100012, China; College of Economics and Management & Research Center for Soft Energy Science, Nanjing University of Aeronautics and Astronautics, Nanjing, 210016, China; School of Management…	The sustainability of producing biodiesel from waste cooking oil (WCO) needs to be thoroughly examined since it is a promising multiple-advantage solution to strengthening energy security, promoting a circular economy, minimizing waste and environmental pollution, and safeguarding food safety. In this study, we employed life cycle assessment (LCA) and life cycle cost (LCC) modeling to evaluate th…	Biodiesel; LCA; LCC; Waste cooking oil	Ministry of Science and Technology of the People's Republic of China, MOST, (2017YFC0505703); Canadian Nuclear Safety Commission, CNSC, (71861137001); Sino-Italian Cooperation of China Natural Science Foundation	Elsevier Ltd	13640321
LCA	By-product	Other		Wang L.; Setoguchi A.; Oishi K.; Sonoda Y.; Kumagai H.; Irbis C.; Inamura T.; Hirooka H.	Life cycle assessment of 36 dairy farms with by-product feeding in Southwestern China	2019	Science of the Total Environment	Sci. Total Environ.	10.1016/j.scitotenv.2019.133985	Graduate School of Agriculture, Kyoto University, Kitashirakawa-oiwake-cho, Sakyo, Kyoto, 606-8502, Japan; Faculty of Life Science and Technology, Kunming University of Science and Technology, 727 Jingming Road (South), Chenggong New District, Kunming, 650500, Yunnan, China; College of Animal Science and Technology, Yangzhou University, Yangzhou, 225009, China	In Southwestern China, dairy farms utilized by-product feeds in dairy production and surplus calves were kept for producing beef as a by-product. However, it is unclear how the environmental impacts are in such dairy production system. This study evaluated, for the first time, the global warming potential (GWP), acidification potential (AP), eutrophication potential (EP) and energy consumption (E…	Acidification; Dairy cattle; Eutrophication; Global warming; Life cycle assessment; Principal component	Ministry of Education, Culture, Sports, Science and Technology, MEXT	Elsevier B.V.	489697
LCA	System	Fibers		Wiedemann S.G.; Biggs L.; Nebel B.; Bauch K.; Laitala K.; Klepp I.G.; Swan P.G.; Watson K.	Environmental impacts associated with the production, use, and end-of-life of a woollen garment	2020	International Journal of Life Cycle Assessment	Int. J. Life Cycle Assess.	10.1007/s11367-020-01766-0	Integrity Ag and Environment, Toowoomba, QLD, Australia; thinkstep, Wellington, New Zealand; Consumption Research Norway (SIFO), Oslo Metropolitan University, Oslo, Norway; Paul G. Swan and Associates Pty. Ltd., Sydney, Australia; NSWWater, Buronga, NSW, Australia	Purpose: The textiles industry is a substantial contributor to environmental impacts through the production, processing, use, and end-of-life of garments. Wool is a high value, natural, and renewable fibre that is used to produce a wide range of garments, from active leisure wear to formal wear, and represents a small segment of the global fashion industry. Woollen garments are produced by long, …	Apparel; Energy; GHG; LCA; Sweater; Textiles; Water; Wool	International Wool and Textiles Organisation; Australian Wool Innovation, AWI; Australian Government	Springer	9483349
LCA, LCC	Energy	Waste		Xiao H.; Zhang D.; Tang Z.; Li K.; Guo H.; Niu X.; Yi L.	Comparative environmental and economic life cycle assessment of dry and wet anaerobic digestion for treating food waste and biogas digestate	2022	Journal of Cleaner Production	J. Clean. Prod.	10.1016/j.jclepro.2022.130674	School of Environment and Energy, South China University of Technology, Guangzhou, 510006, China; Guangdong Provincial Key Laboratory of Petrochemical Pollution Processes and Control, School of Environmental Science and Engineering, Guangdong University of Petrochemical Technology, Maoming, 525000, China; Key Laboratory of Renewable Energy, Guangzhou Institute of Energy Conversion, Chinese Academ…	Anaerobic digestion (AD) has proven to be a promising option for food waste (FW) management, due to the significant potential of recovering energy from waste. In this study, the environmental and economic impacts of six scenarios for FW and biogas digestate management in Shenzhen, China, were evaluated using life cycle assessment (LCA) and life cycle cost (LCC) analysis. GaBi model was employed t…	Anaerobic digestion; Biogas digestate; Food waste; Life cycle assessment	Research Project of Sino-Singapore international Joint Research Institute, (202-A018001); Science and Technology Planning Project of Maoming, China, (2019S002); Natural Science Foundation of Guangdong Province, (2017A030313239); National Key Research and Development Program of China, NKRDPC, (2019YFA0210400)	Elsevier Ltd	9596526
societal LCC, ECE, LCA, LCC	Method	Food		Yang N.; Li F.; Liu Y.; Dai T.; Wang Q.; Zhang J.; Dai Z.; Yu B.	Environmental and Economic Life-Cycle Assessments of Household Food Waste Management Systems: A Comparative Review of Methodology and Research Progress	2022	Sustainability (Switzerland)	Sustainability	10.3390/su14137533	Shenzhen Academy of Environmental Sciences, 50 Honggui Road, Shenzhen, 518001, China; Guangdong Environmental Protection Sewage High Quality Utilization Engineering Technology R&D Center, Shenzhen, 518001, China; Shenzhen Municipal Solid Waste Sorting Management Service Center, Shenzhen, 518001, China	Household food waste (HFW) is the main component of municipal solid waste (MSW). Appropriate HFW management strategies could reduce the environmental burdens and economic costs to society. Life-cycle thinking is an effective decision-making tool for MSW management. This paper compares the three main environmental and economic assessment methodologies, i.e., societal life-cycle costing (societal L…	anaerobic digestion; inventory; life-cycle assessment; life-cycle costing; source sorting; waste classification	National Natural Science Foundation of China, NSFC, (51808349); Shenzhen Fundamental Research Program, (JCYJ20180302173924767)	MDPI	20711050
LCCA	Method	Other		Younis A.; Ebead U.; Judd S.	Life cycle cost analysis of structural concrete using seawater, recycled concrete aggregate, and GFRP reinforcement	2018	Construction and Building Materials	Constr Build Mater	10.1016/j.conbuildmat.2018.04.183	Department of Civil and Architectural Engineering, Qatar University, P.O. Box 2713, Doha, Qatar; Department of Civil and Architectural Engineering, College of Engineering, Qatar University, P. O. Box 2713, Doha, Qatar; Chair in Environmental Engineering, Gas Processing Center, Qatar University, Qatar	Using seawater and recycled concrete aggregate (RCA) in a concrete mix is potentially advantageous from a sustainability perspective. However, the high chloride levels expected in such a case demands the use of non-corrosive reinforcement in lieu of normal black steel to avoid corrosion problems. Glass fiber reinforced polymer (GFRP) is considered promising as an alternative reinforcement owing t…	Cost performance; GFRP-reinforced concrete; Life cycle costing; Recycled concrete aggregate; Seawater; Stainless steel; Sustainability	Qatar Foundation, QF; Qatar National Research Fund, QNRF	Elsevier Ltd	9500618
LCA, LCC	Product	Waste		Yu Y.; Zhao X.; Xie T.; Wang X.	Eco-, economic- and mechanical- efficiencies of using precast rejects as coarse aggregates in self-compacting concrete	2022	Case Studies in Construction Materials	Case Stud. Constr. Mater.	10.1016/j.cscm.2022.e01591	School of Environment and Civil Engineering, Dongguan University of Technology, Dongguan, 523808, China; State Key Laboratory of Subtropical Building Science, South China University of Technology, Guangzhou, 510641, China; College of Civil Engineering, Southeast University, Nanjing, 211189, China	This paper investigates the eco-, economic- and mechanical- properties of self-compacting concrete (SCC) containing recycled coarse aggregates generated from prefabricated concrete rejects (PRA) or construction and demolition wastes (CRA). A total of 720 specimens from 36 unique SCC mixes are prepared and tested. The effects of the key parameters including, water-to-binder ratio (w/b), fly ash re…	High temperature curing; Life cycle assessment; Life cycle cost analysis; Precast concrete rejects; Self-compacting concrete	National Natural Science Foundation of China, NSFC, (52008108); Basic and Applied Basic Research Foundation of Guangdong Province, (2019A1515110050, 2019A1515110481)	Elsevier Ltd	22145095
LCA	Manufacture	Fashion and furniture		Yurtaslan Ö.; Altun Kurtoğlu Ş.; Yılmaz D.	Closed-loop Mechanical Recycling Opportunities in Industrial Cotton Wastes	2022	Journal of Natural Fibers	J. Nat. Fibres	10.1080/15440478.2022.2044961	Fibre and Polymer Engineering Department, Bursa Technical University, Bursa, Turkey; Artisan Technical Consultancy, Bursa, Turkey; Textile Engineering Department, Süleyman Demirel University, Isparta, Turkey	Reusing industrial wastes in textile production is essential to reduce the total environmental burden of textile products. This study proved that the wastes generated in the ring-spinning process of a lightweight cotton shirting-producing company could be turned into fabrics used in shirts, jackets, and trousers. A total of 21 different yarns in four different counts containing 5–100% waste were …	closed-loop recycling; Industrial waste; LCA; OE-rotor spinning; ring spinning	Reysan İplik Tekstil Sanayi Dış Ticaret Ltd; Söktaş Tekstil San; TUBİTAK; Türkiye Bilimsel ve Teknolojik Araştırma Kurumu, TÜBİTAK, (0999)	Taylor and Francis Ltd.	15440478
EIO-LCA	By-product	Other		Zhi Y.; Hamilton P.B.; Wang X.; Liang L.	Water footprint assessment considering intermediate products: model and a 2016 case study of China	2019	Water and Environment Journal	Water Environ. J.	10.1111/wej.12394	Institution of China Karst Rural Revitalization Research, Guizhou University, Guiyang, China; School of Economics, Guizhou University, Guiyang, China; Research and Collections Division, Canadian Museum of Nature, Ottawa, Canada	Analysing intermediate products within a water footprint (WF) across different economic sectors can show the root causes of water usage and is helpful for water resource management and policy making. However, conventional methods and data for a WF rarely assess the input and output of intermediate products directly and comprehensively. Therefore, this study proposes an approach to access the WF o…	EIO-LCA; intermediate products; virtual water; water footprint; water resources	Canadian Museum of Nature Research Advisory Council; Guizhou Construction Project of First-class in Agriculture and Forestry Economic Management of Guizhou University, (GNYL[2017]002); Guizhou Science & Technology Foundation, (QKHJC20161034); Ministry of Education of the People's Republic of China, MOE, (16YJC790150)	Blackwell Publishing Ltd	17476585
LCA, LCC, S-LCA	System	Other		Zimmermann A.	Optimization of sustainable dairy-cow feeding systems with an economic-ecological LP farm model using various optimization processes	2008	Journal of Sustainable Agriculture	J. Sustainable Agric.	10.1080/10440040802121411	Agroscope Reckenholz-Tanikon ART, Ettenhausen, Switzerland; Agroscope Reckenholz-Tänikon ART, Research Station for Agricultural Economics and Engineering, CH-8356 Ettenhausen, Switzerland	Feed production accounts for a substantial proportion of the environmental impact of animal husbandry. To enable assessment of the sustainability of dairy-cow feeding systems, a life cycle assessment (LCA) as well as additional social indicators were incorporated at farm level in a linear optimization model. Various feeding strategies were investigated using different optimization options for mul…	Feeding; Life cycle assessment (LCA); Linear programming (LP); Milk production; Multi-objective optimization; Sustainability			15407578
